# Supplementary material for: TNKS1BP1 functions in DNA double-strand break repair though facilitating DNA-PKcs autophosphorylation dependent on PARP-1
Source: PubMed Central journal article supplement (PMC4466666; doi:10.18632/oncotarget.3137), 2015-02-04
Supplement: oncotarget-06-7011-s001.pdf [file oncotarget-06-7011-s001.pdf]

## SUPPLEMENTARY MATERIALS AND METHODS

### Cell cycle analysis

Cells were given 4 Gy ionizing radiation, and harvested at the indicated time points, washed with PBS three times, then fixed in cold 70% ethanol ( $-20^{\circ}\text{C}$ ) overnight. The cell sediment was collected by centrifugation at 1000 g for 3 min, and washed 3 times with PBS, digested with 40  $\mu\text{l}$  RNase A (10 mg/ml) for 30 min at  $37^{\circ}\text{C}$ , and stained with 10  $\mu\text{g/ml}$  Propidium iodide for 15 min at room temperature. Cell cycle distributions were analyzed using flow cytometry. All experiments were repeated 3 times.

### Comet assay

For the neutral comet assay, after being given 4Gy IR, the cells were collected at 0, 1, 2, 4 h after

irradiation, and mixed with 0.625% low melting point agarose (LMP) at  $37^{\circ}\text{C}$ . Then the mixture was placed onto the top of a previously formed layer of 1% normal melting point agarose (NMP) on one slide, covered with a cover slip and placed at  $4^{\circ}\text{C}$  for 15 min. Then the cover slip was gently removed and the slide was placed in cold neutral lysis solution (2.5 M NaCl, 100 mM EDTA, 10 mM Tris base, 1% Triton X-100, 10% DMSO, pH = 8.0) for 3 h. The slide was washed 3 times in chilled neutralization buffer (90 mM Tris base, 90 mM boric acid, 2 mM  $\text{Na}_2\text{EDTA}$ , pH 8.0) for 1 h each time, and subjected to electrophoresis at  $4^{\circ}\text{C}$  for 25 min at 20 V. Thereafter, the slides were gently washed with PBS, and stained with 1  $\mu\text{g/ml}$  PI for 5 min at room temperature. Cells were visualized at  $200\times$  magnification using a fluorescence microscope.

## SUPPLEMENTARY FIGURES

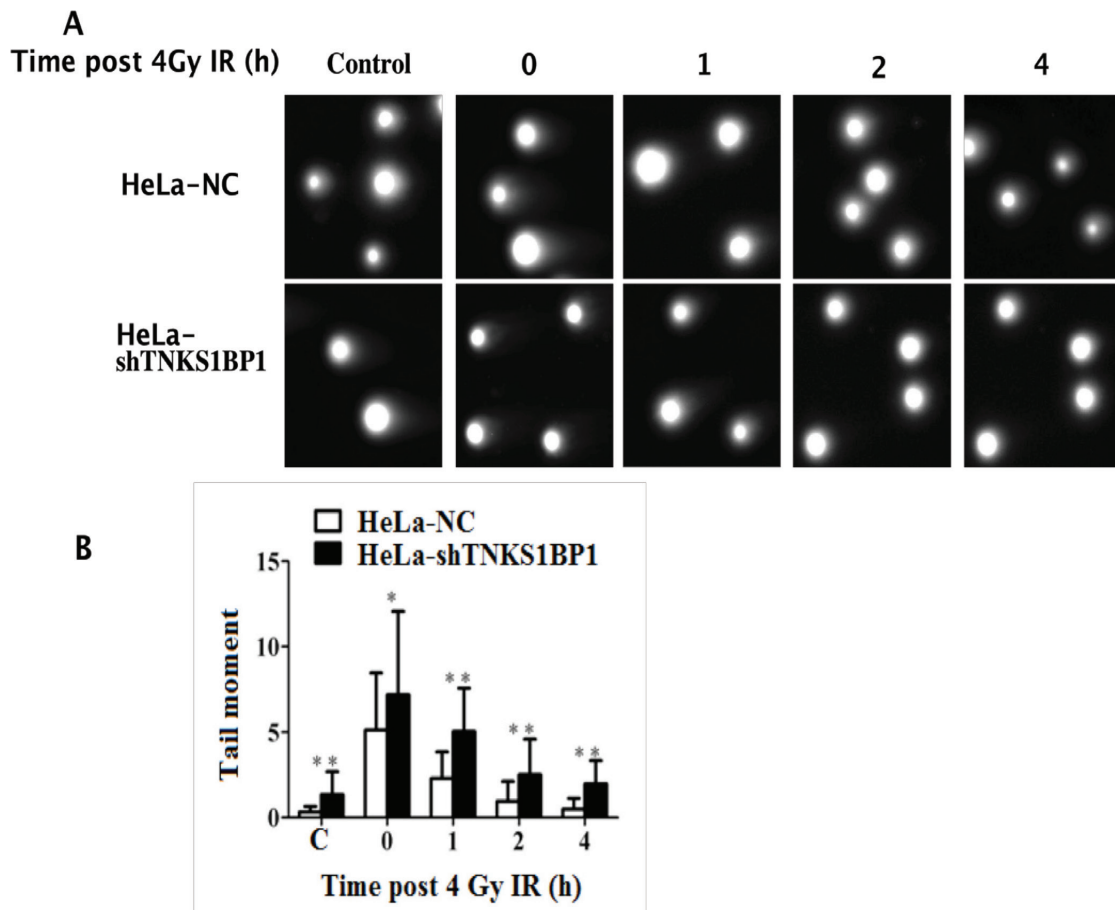

**Supplementary Figure 1: Loss of TNKS1BP1 leads to defective DNA double-strand break repair.** (A) Neutral comet assay analyzed the DNA double-strand breaks and repair in 4 Gy-irradiated cells. (B) Repair kinetics of 4 Gy-induced DSBs detected by comet assay. \* $P < 0.05$ , \*\* $P < 0.01$ , comparison between HeLa-shTNKS1BP1 cells and HeLa-NC cells.

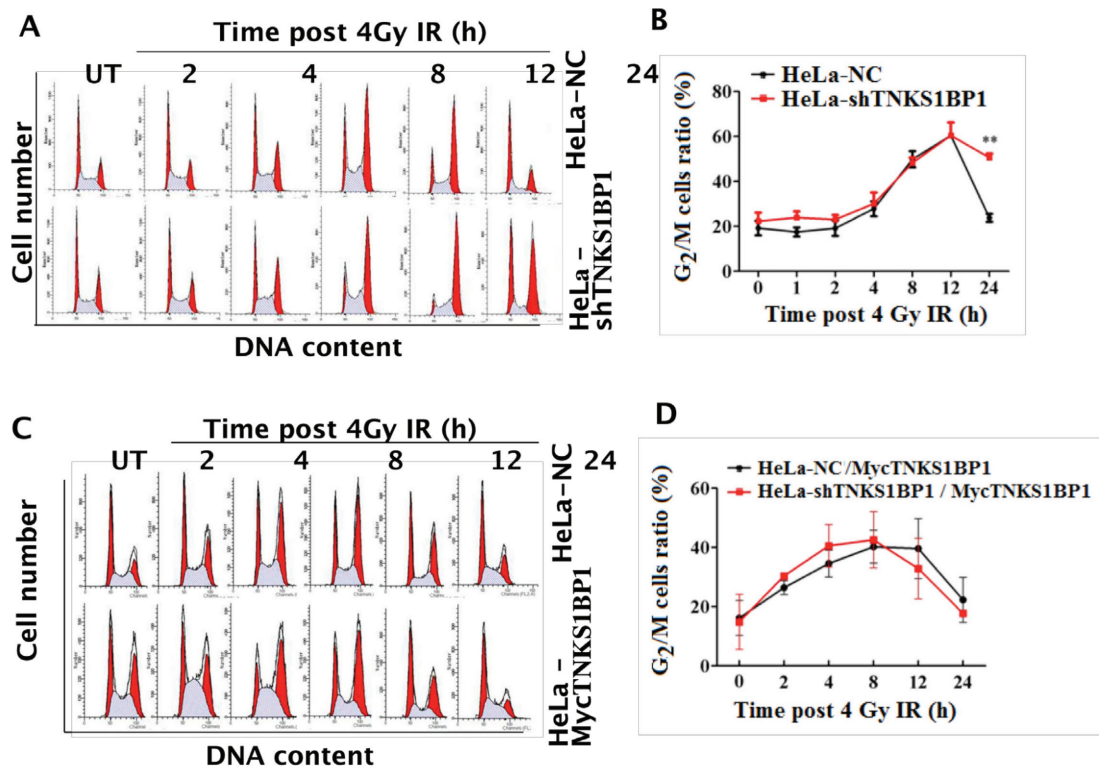

**Supplementary Figure 2: Effect of TNKS1BP1 expression on cell cycle progression in response to IR.** (A) TNKS1BP1 knockdown and control cells were treated with 4 Gy IR and collected at indicated time points postirradiation. (B) Quantitative analysis of cell cycle distribution of 4Gy irradiated TNKS1BP1-depleted and control HeLa cells. (C) ShRNA-resistant TNKS1BP1 expressing vector was transfected into HeLa-shTNKS1BP1 cells and the cells were treated with 4 Gy and collected at indicated time points postirradiation. (D) Quantitative analysis of cell cycle distribution of 4Gy irradiated TNKS1BP1-overexpression and control HeLa cells.
